# Supplementary material for: Characterization of the Brønsted acidity of PtSn/Al2O3surfaces by adsorption of 2,6-di-tert-butylpyridine
Source: Royal Society of Chemistry journal article supplement (doi:10.1039/d2nj00602b), 2022-01-01
Supplement: d2nj00602b1.pdf [file d2nj00602b1.pdf]

## Supporting information's

### NJC

## Characterization of the Brønsted acidity of PtSn/Al<sub>2</sub>O<sub>3</sub> surfaces by adsorption of 2,6-di-tert-butylpyridine

Quentin Rivet, Jordan Meyet, Mickaël Rivallan, Thibaud Nardin, and David Farrusseng

|    |                                                                 |   |
|----|-----------------------------------------------------------------|---|
| 1. | AMMONIA CONCENTRATION DESORBED DURING NH <sub>3</sub> TPD ..... | 2 |
| 2. | NH <sub>3</sub> DENSITY EQUATION .....                          | 3 |
| 3. | PYRIDINE EQUATION.....                                          | 3 |
| 4. | IR SPECTRA OBTAINED WITH THE 2,6DTBPYR PROBE MOLECULE.....      | 4 |
| 5. | ALUMINA SUPPORT .....                                           | 6 |
| 6. | ARTICLE FIGURE WITH %CL AND μMOL G <sup>-1</sup> UNITS .....    | 7 |

The presented study showed the relevance of using 2,6-di-tert-butylpyridine to probe BAS on alumina catalysts.

# 1. Ammonia concentration desorbed during NH3 TPD

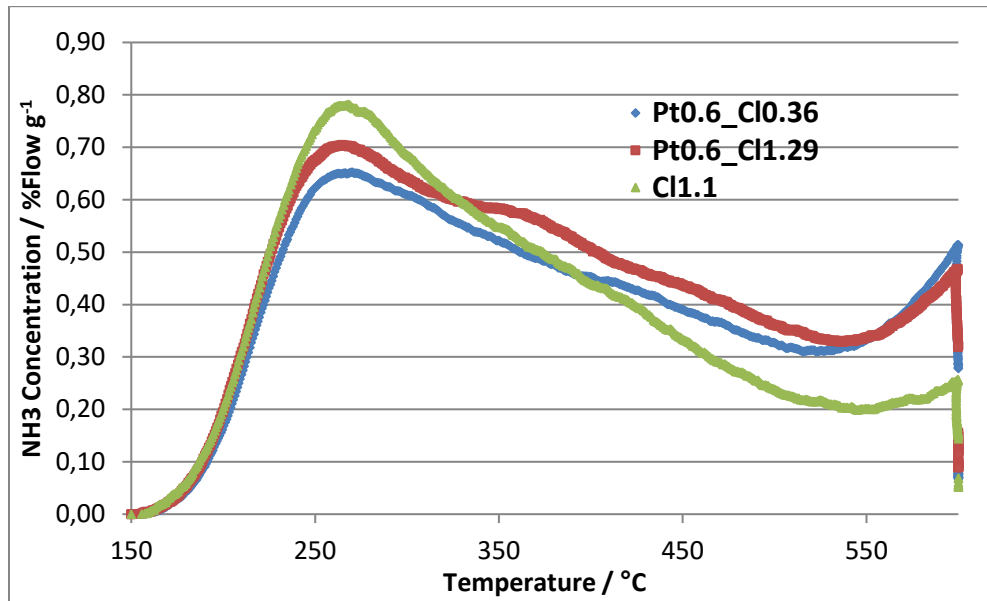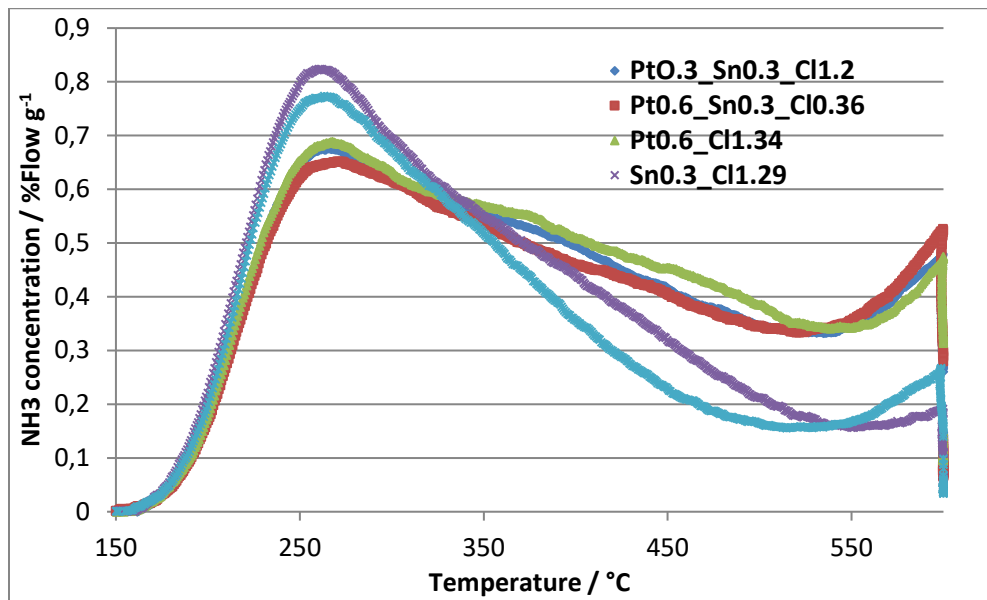

## 2. NH<sub>3</sub> density equation

Equation for the determination of the density of NH<sub>3</sub> measured.

First the thermal desorption profile is deconvoluted arbitrarily giving an amount of ammonia per gram of sample. Then a number of sites per nm<sup>-2</sup> is calculated:

$$NH_3(\text{site nm}^{-2}) = \frac{Q_{NH_3} * N_A}{S_{BET}}$$

Q<sub>NH<sub>3</sub></sub> the NH<sub>3</sub> quantity in mol g<sup>-1</sup>

N<sub>A</sub> the Avogadro constant in mol<sup>-1</sup>

S<sub>BET</sub> the specific area of the sample in nm<sup>2</sup> g<sup>-1</sup>

## 3. Pyridine equation

To obtain a quantification of sites through IR pyridine, equations based on the Beer-Lambert law are used:

- The first equation is the Beer-Lambert law:  $A = \varepsilon_\nu \cdot l \cdot C_\nu$

A is the absorbance

$\varepsilon_\nu$  the molar extinction coefficient in cm<sup>2</sup> mol<sup>-1</sup> with  $\nu$  referring to a specific vibration

L the optical path length in cm

C <sub>$\nu$</sub>  the concentration of the attenuating specie mol cm<sup>-3</sup>

- The second and third equation are the derivative means to obtain a quantification of sites either LAS or BAS.

$$l = \frac{m}{S \cdot d} \quad ; \quad BAS (\text{mol g}^{-1}) = \frac{C_\nu}{d} = \frac{A_\nu \cdot S}{\varepsilon_\nu \cdot m}$$

m the mass of the sample in g ; S the surface area of the sample in cm<sup>2</sup> ; d the density of the sample in g cm<sup>-3</sup>

BAS the number of Brønsted acid site in mol g<sup>-1</sup> ; A <sub>$\nu$</sub>  the integrated absorbance in cm<sup>-1</sup> ;  $\varepsilon_\nu$  the apparent molar extinction coefficient in cm mol<sup>-1</sup>.

Same calculations as in section 2 are deployed to acquire density of SAB in site nm<sup>-2</sup>

#### 4. IR spectra obtained with the 2,6DTBPyr probe molecule

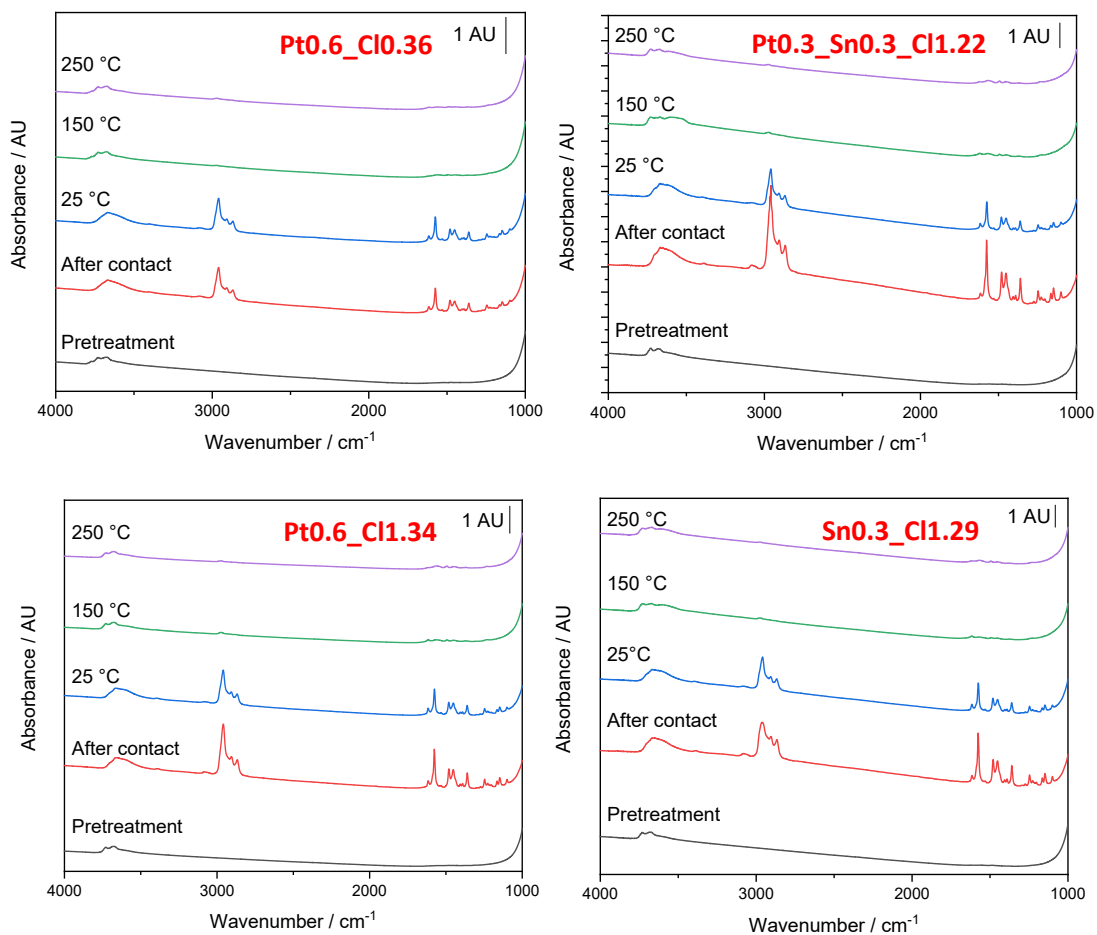

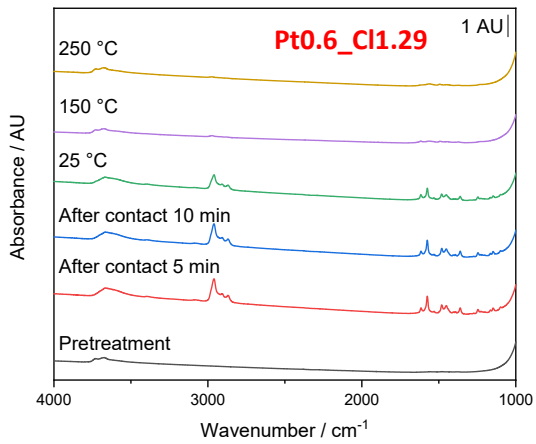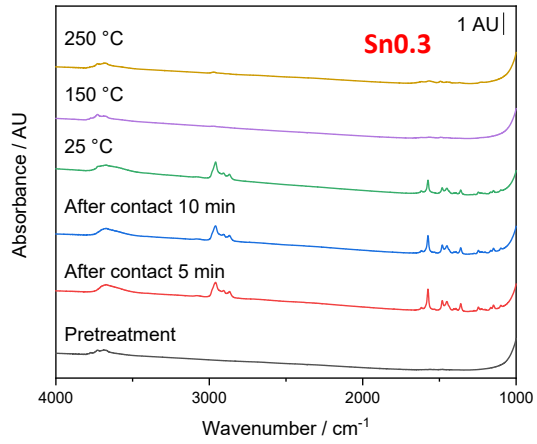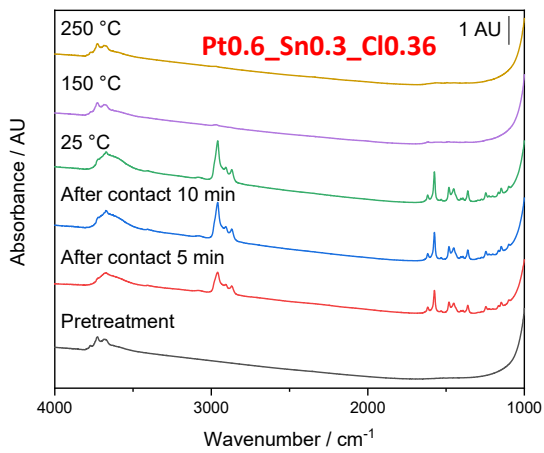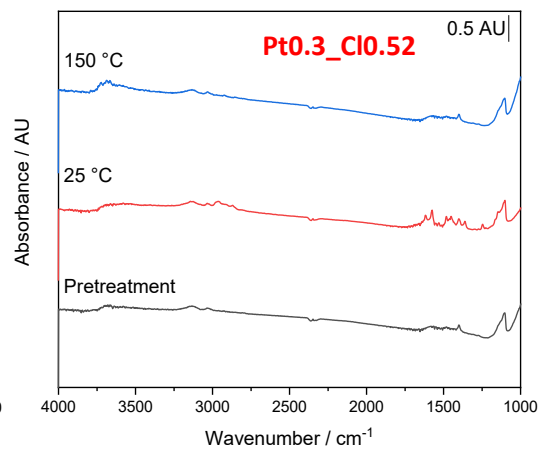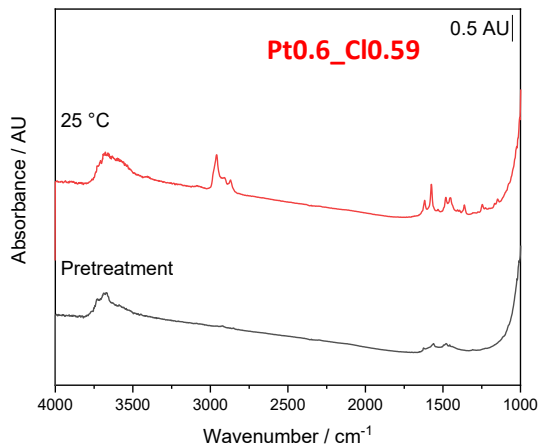

## 5. Alumina support IR characterization

| Catalyst | BAS<br>Site nm <sup>-2</sup> | BAS<br>μmol g <sup>-1</sup> | D <sub>Cl</sub><br>Cl nm <sup>-2</sup> |
|----------|------------------------------|-----------------------------|----------------------------------------|
| Alumina  | 0.042                        | 11.67                       | 0                                      |

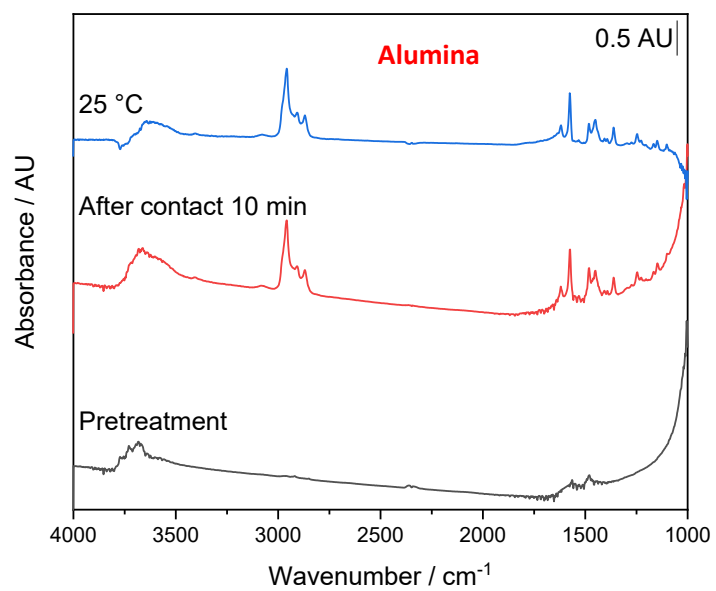

## 6. Article figure with %Cl and $\mu\text{mol g}^{-1}$ units

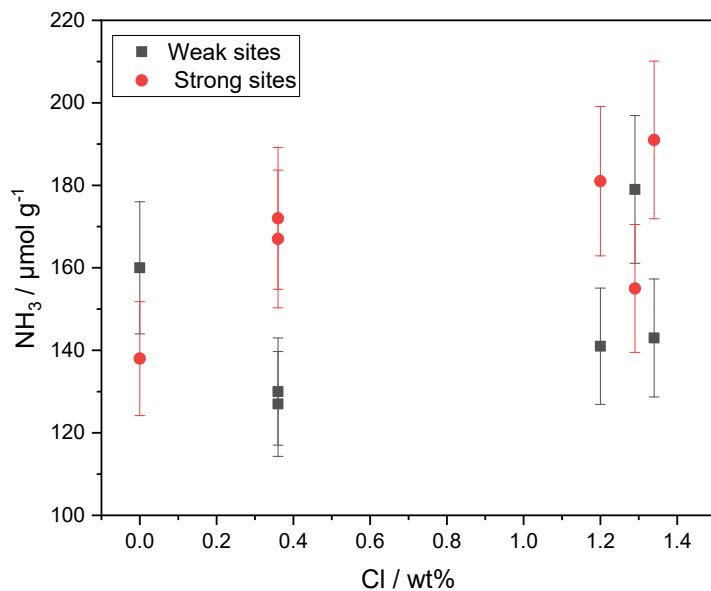

Fig. 1 Concentration of  $\text{NH}_3$  desorbed in regard to the chlorine loading of catalyst

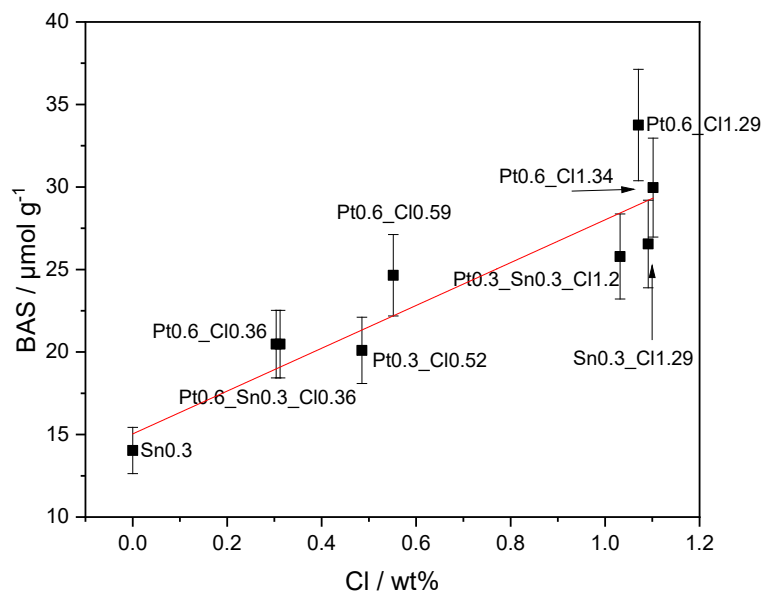

Fig. 4 Concentration of Brønsted acid sites in regard to the chlorine loading of catalyst
